# Supplementary material for: Ubiquitin-like protein 3 (UBL3) is required for MARCH ubiquitination of major histocompatibility complex class II and CD86
Source: PubMed Central journal article supplement (PMC9001657; doi:10.1038/s41467-022-29524-w), 2022-04-11
Supplement: 41467_2022_29524_MOESM1_ESM.pdf [file 41467_2022_29524_MOESM1_ESM.pdf]

## **Supplementary Information**

**Ubiquitin-like protein 3 (UBL3) is required for MARCH ubiquitination of major histocompatibility complex class II and CD86**

Liu et al.

## Supplementary figure 1

a

*Ubl3* exon 1 predicted cut site

*Ubl3* WT sequence ...AAACCTCTGGCCCACTCTCAAAGGCAAGATGTCCAGTCATGTCCCGGCG | GATATGGTAAGTGAACGATAAGT...

*ΔUbl3* (clone #1)

allele 1 45.27% ...AAACCTCTGGCCCACTCTCAAAGGCAAGATGTCCAGTCATGTCCCGGCG | -ATATGGTAAGTGAACGATAAGT...

allele 2 39.36% ...AAACCTCTGGCCCACTCTCAAAGGCAAGATGTCCAGTCATGTCCCGGCG | --TATGGTAAGTGAACGATAAGT...

b

Myc-tag

EQKLISEEDL MSSHVPADMI NLRILIVSGK TKEFLFSPND SASDIAKHVY  
DNWPMDWEEE QVSSPNILRL IYQGRFLHGN VTLGALKLPF GKTVMHLVA  
RETLPEPNSQ GQRNREKTGE SNCCVIL

Cys<sub>114</sub> required for prenylation CAAX prenylation motif

**Supplementary figure 1. Details of  $\Delta Ubl3$  MutuDC cell line and UBL3 constructs.** (a) Genomic DNA was purified from wild type MutuDC or single cell cloned  $\Delta Ubl3$  MutuDC and the targeted gene region in *Ubl3* exon 1 (grey box) was amplified by PCR. Formation of InDels was analysed using Sanger sequencing and inference of CRISPR edits (ICE) analysis. The WT genomic sequence flanking the targeted site is shown on top, with the 20-nucleotides gRNA target region underlined in red. Sequencing of  $\Delta Ubl3$  MutuDC cells is shown below, including the type of InDel of each predicted allele and their quantitative contribution as calculated by ICE, frameshift mutations are highlighted in yellow. (b) Amino acid sequence of Myc-tagged (blue box) UBL3 constructs used in this study. The prenylation mutant UBL3<sub>C114S</sub> contains a serine instead of cysteine 114 within the CAAX motif (yellow box).

## Supplementary figure 2

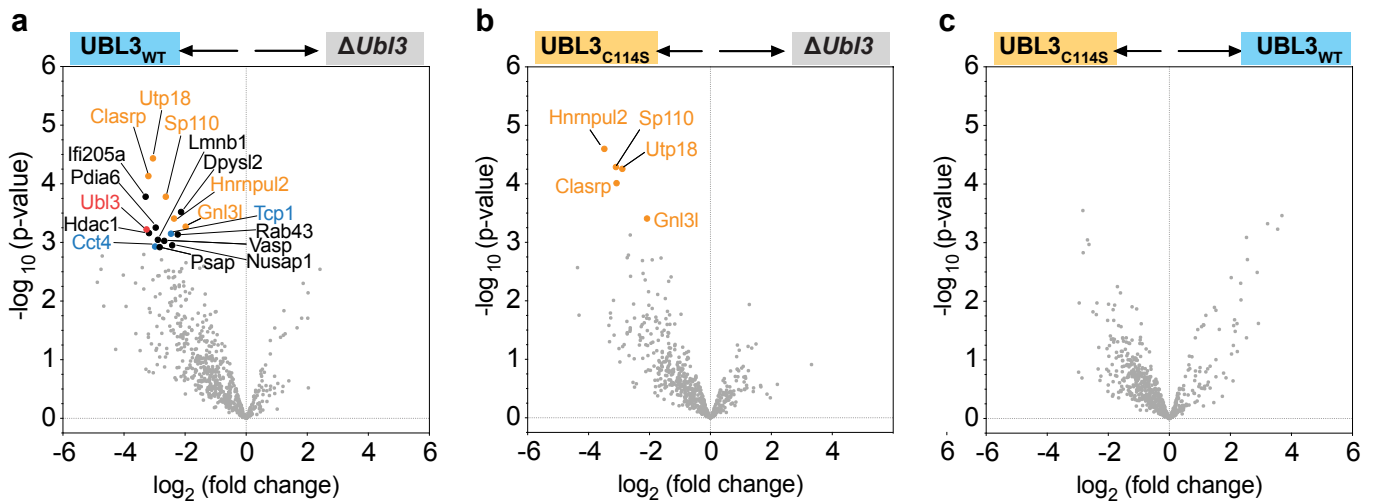

**Supplementary figure 2. Volcano plot of mass spectrometry analysis of immunoprecipitated UBL3.** Anti-Myc immunoprecipitates from (a)  $\Delta Ubl3$  MutuDC (" $\Delta Ubl3$ "), or (b-c)  $\Delta Ubl3$  MutuDC retrovirally transduced with (b) Myc-tagged wild type UBL3 ("UBL3<sub>WT</sub>") or (c) UBL3<sub>C114S</sub> mutant ("UBL3<sub>C114S</sub>") were analysed by mass spectrometry and differential expression analysis was performed using the Bioconductor package limma, with adjustment for multiple testing using the Benjamini-Hochberg false discovery rate (FDR) method. Proteins were considered significantly enriched with an adjusted p-value cut-off <0.05 and  $\log_2$  fold change >1 (see methods). 1329 proteins were detected, with 637 proteins analysed by LFQ. Black = significantly enriched proteins, red = UBL3, yellow = proteins enriched in both UBL3<sub>WT</sub> vs  $\Delta Ubl3$  and UBL3<sub>C114S</sub> vs  $\Delta Ubl3$ , and blue = proteins involved in tubulin folding.

### Supplementary figure 3

a

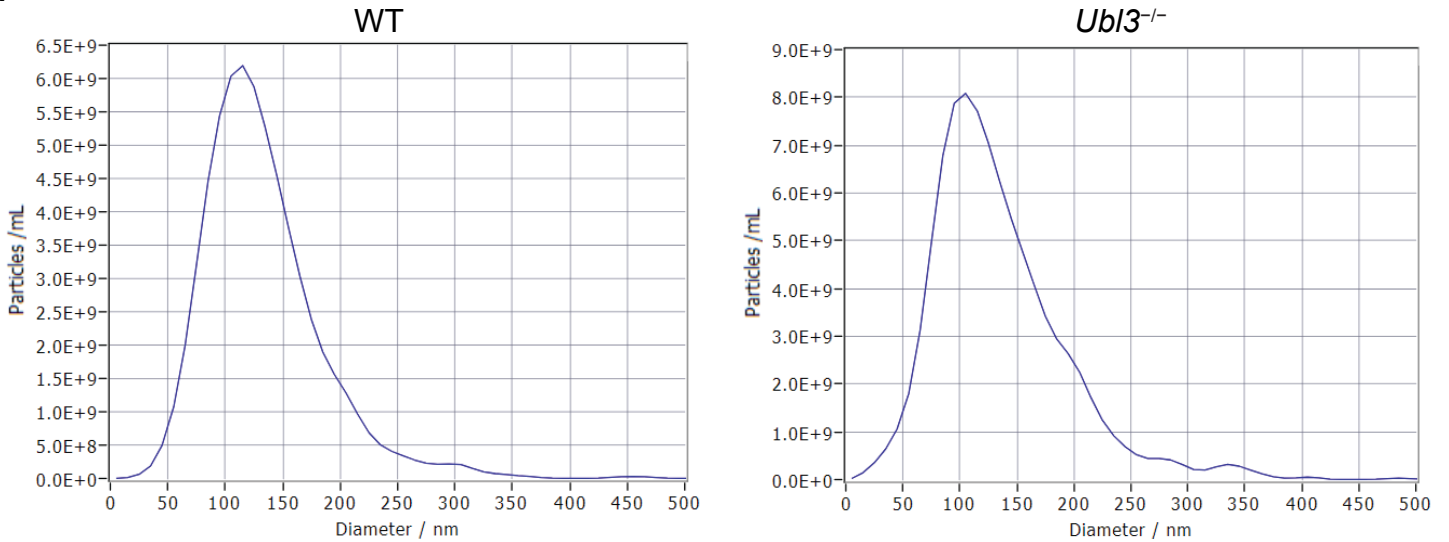

b

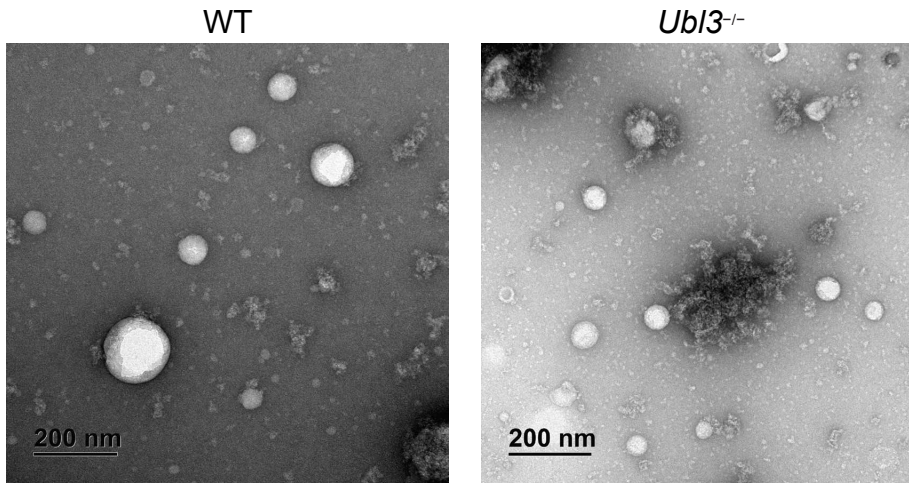

c

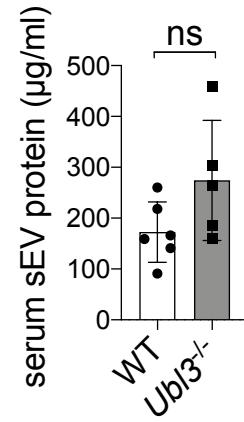

**Supplementary figure 3. Loss of UBL3 does not affect protein content of serum small extracellular vesicles (sEVs).** Small extracellular vesicles were isolated from serum of wild type or *Ubl3*<sup>-/-</sup> mice using differential ultracentrifugation. (a) Characterization of sEVs was performed by nanoparticle tracking analysis (NTA), where the size distributions indicate an enrichment of particles between 50-250 nm in both wild type sEV (left) and *Ubl3*<sup>-/-</sup> sEV (right). Average of 11 measurements is shown. (b) TEM analysis, where wild type sEV (left), and *Ubl3*<sup>-/-</sup> sEV (right) indicate the presence of vesicles possessing the size and characteristic cup shape of sEVs. Representative images are shown out of 14 (WT) or 25 (*Ubl3*<sup>-/-</sup>) images taken in one experiment. (c) Protein content of isolated sEV was measured via BCA. Bars show mean ± SD with symbols representing individual mice, n = 6 for WT, 5 for *Ubl3*<sup>-/-</sup> examined across two independent experiments. Unpaired t test (two-sided), ns not significant.

## Supplementary figure 4

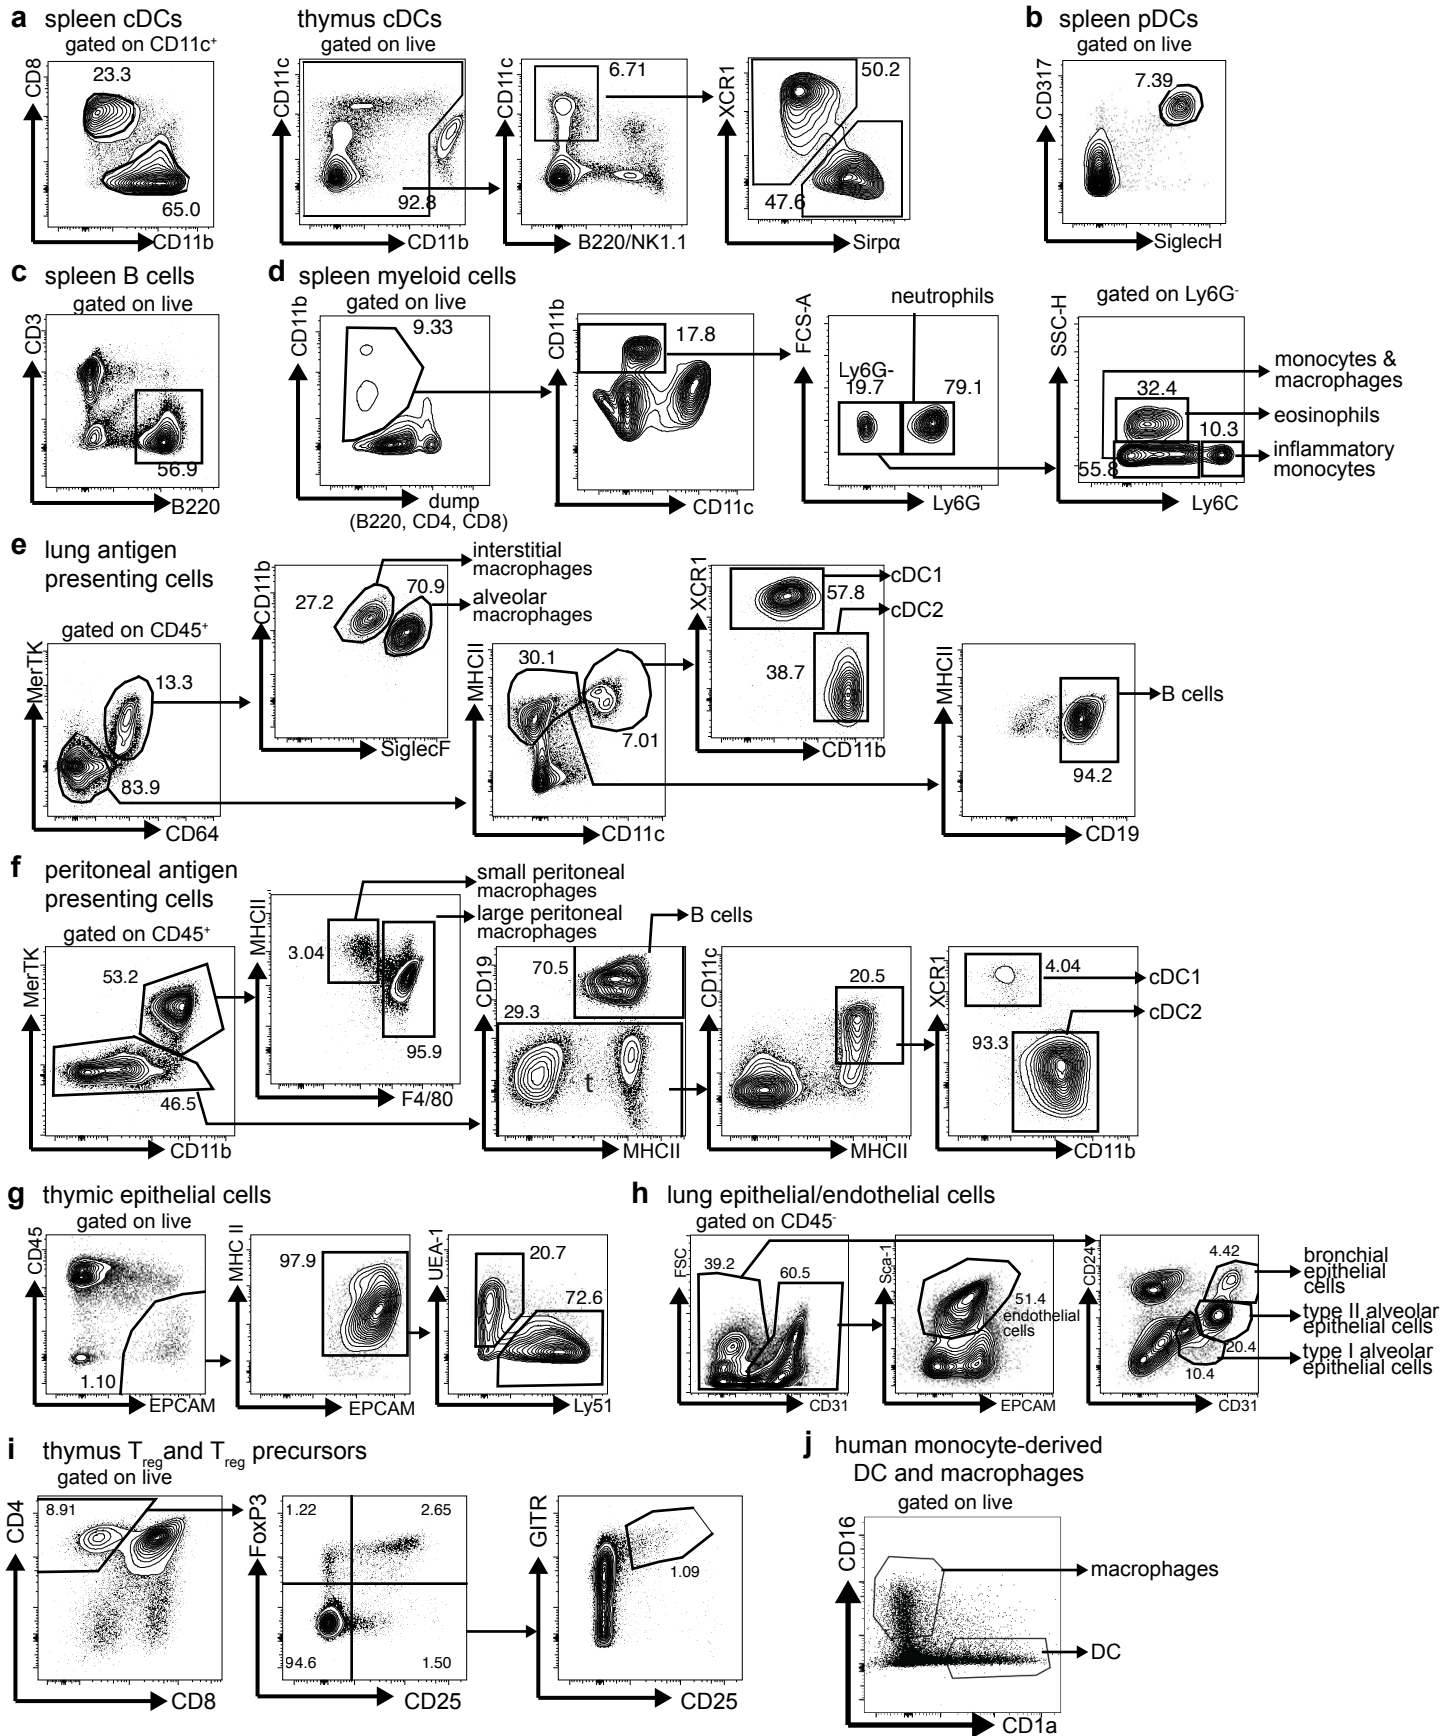

**Supplementary figure 4. Gating strategies for flow cytometry analysis of primary immune cells.** Isolated cell populations were gated on forward and side scatter, followed by exclusion of dead cells (propidium iodide positive). Example gating is shown for murine (a) spleen and thymus dendritic cells, (b) spleen plasmacytoid dendritic cells, (c) spleen B cells, (d) spleen myeloid cells, (e) lung antigen presenting cells, (f) peritoneal antigen presenting cells, (g) thymic epithelial cells, (h) lung epithelial cells, (i) thymus T<sub>reg</sub> and T<sub>reg</sub> precursors, and (j) human monocyte-derived macrophages and dendritic cells.

## Supplementary figure 5

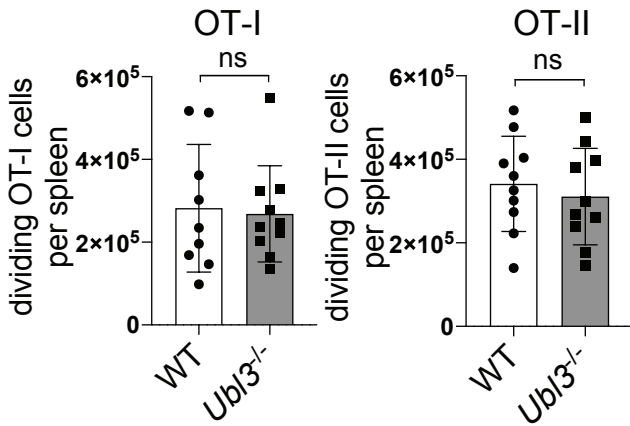

**Supplementary figure 5. Lack of UBL3 does not affect OVA protein antigen presentation *in vivo*.** Purified CellTrace Violet (CTV)-labelled OT-I and OT-II cells were adoptively transferred into *Ubl3*<sup>-/-</sup> and WT mice. 24 hours later, mice were injected with 50  $\mu$ g ovalbumin (OVA), and spleens were harvested after 64 hours. Antigen presentation capacity was assessed by flow cytometric analysis of CTV-dilution to measure T cell proliferation. The number of dividing OT-I and OT-II was determined as described in Materials and Methods. Data from  $n = 9$  for WT 10 for *Ubl3*<sup>-/-</sup> (OT-I) or  $n = 10$  (OT-II) examined over two independent experiments, Symbols represent individual mice and bars show mean  $\pm$  SD, ns not significant, unpaired t test (two-sided).

## Supplementary figure 6

a thymus

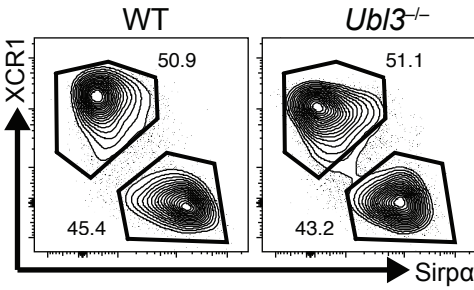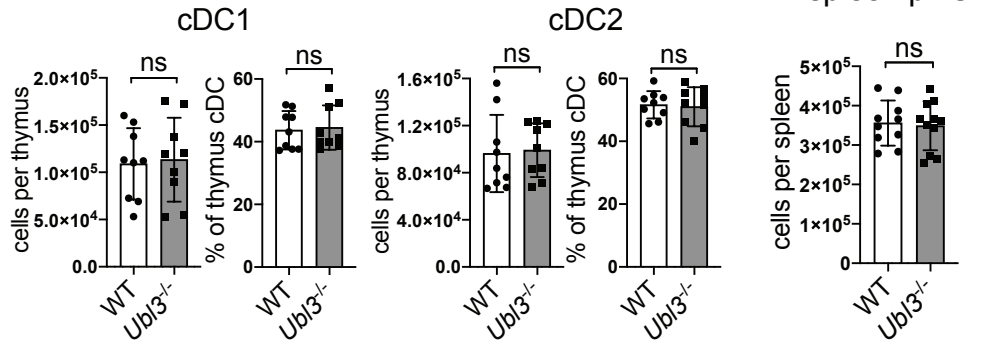

**Supplementary figure 6. *Ubi3* deletion does not change thymic cDC or splenic pDC populations.** Quantification of (a) thymus cDCs or (b) spleen pDCs of WT or *Ubi3*<sup>-/-</sup> mice, with cDC1 being identified as XCR1<sup>+</sup>Sirpα<sup>+</sup>, cDC2 identified as XCR1<sup>+</sup>Sirpα<sup>-</sup>, and pDCs identified as CD317<sup>+</sup>SiglecH<sup>+</sup>. For detailed gating strategy see Supplementary figure 2. Absolute cell numbers were determined as described in Materials and Methods. Data from (a) n = 9 mice examined over three independent experiments or (b) n = 10 for WT 11 for *Ubi3*<sup>-/-</sup> examined over two experiments, with symbols representing individual mice and bars mean ± SD, ns not significant, unpaired t test (two-sided).

## Supplementary figure 7

### a cDC representative histograms

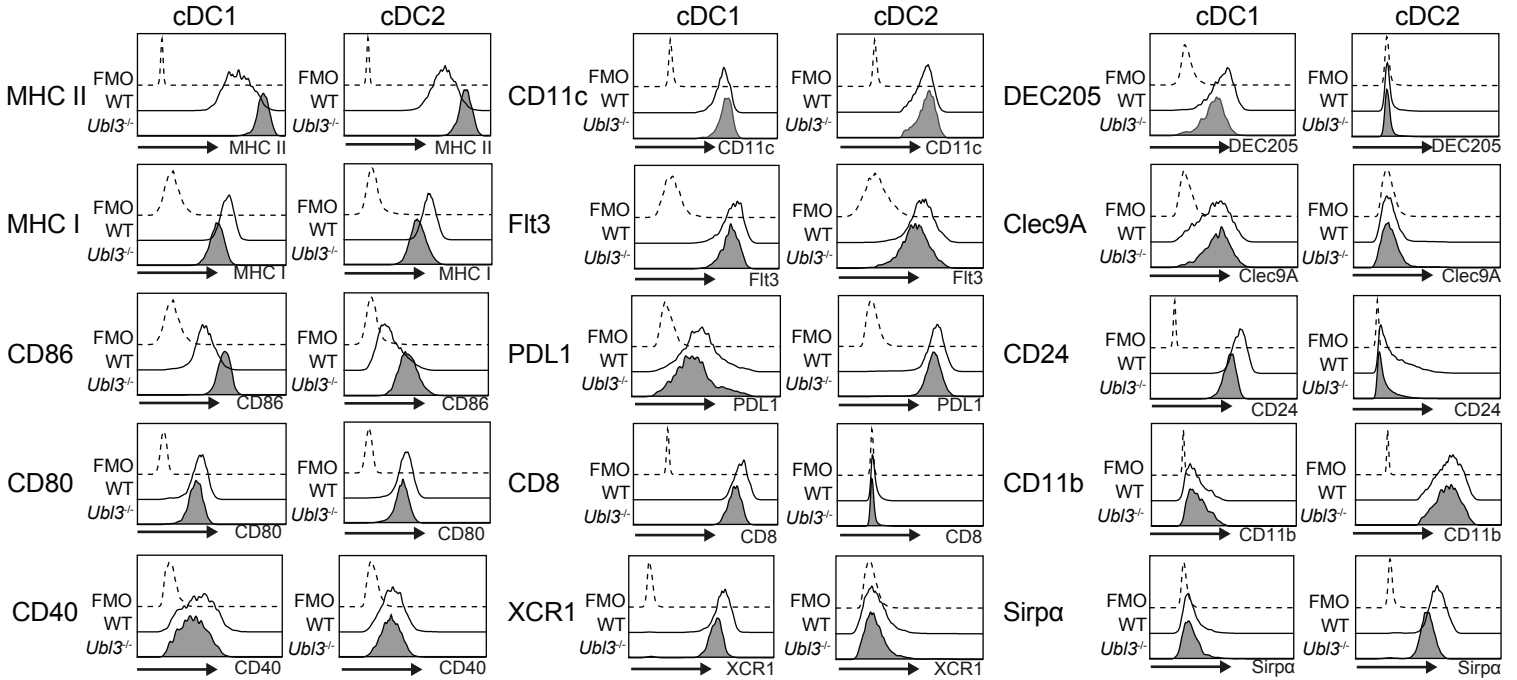

### b B cells representative histograms

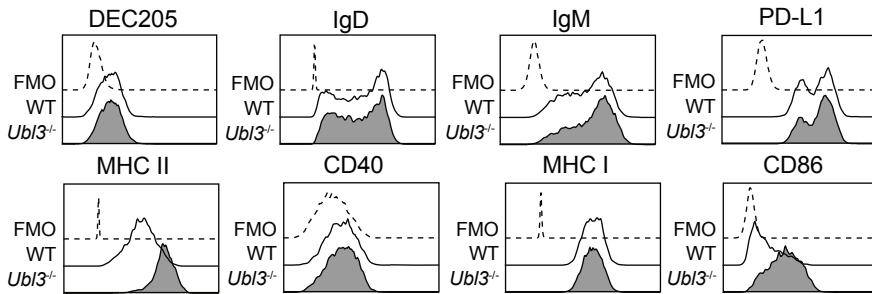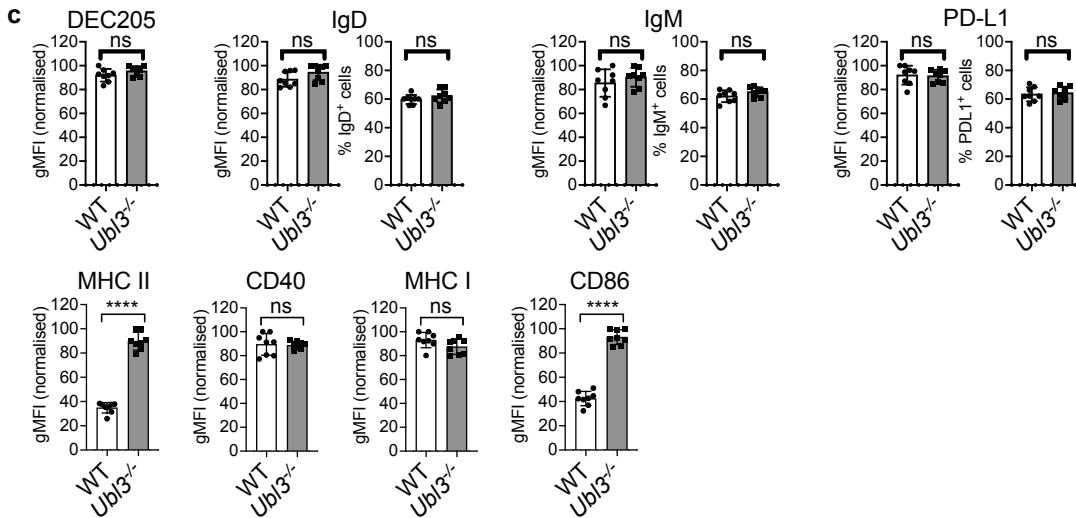

**Supplementary figure 7. *Ubl3* affects cDC and B cell surface marker expression.** Spleen (a) cDC1 and cDC2 or (b-c) B cells were enriched from WT and *Ubl3*<sup>-/-</sup> mice and stained for indicated surface markers. Shown are representative histograms (a-b) of marker staining for fluorescence minus one (FMO, dashed lines), wild type (WT, black lines) and *Ubl3*<sup>-/-</sup> samples (grey filled histograms), and (c) geometric mean fluorescence intensity for B220<sup>+</sup>CD19<sup>+</sup> B cells, with n = 8 mice examined over two independent experiments, with bars showing mean ± SD and symbols representing individual mice. \*\*\*\* P < 0.0001, ns not significant, unpaired t test (two-sided).



## Supplementary figure 8

proposed model of action

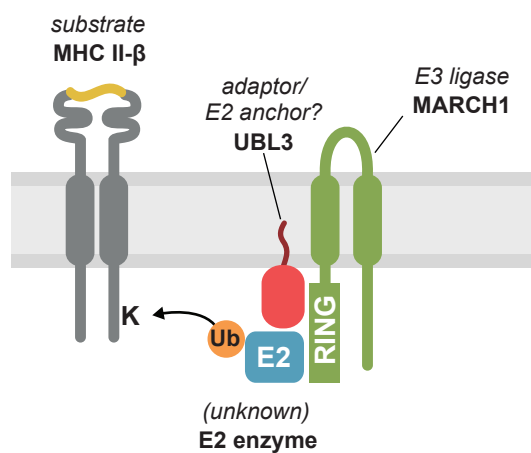

**Supplementary figure 8. Proposed model of UBL3 regulation of MHCII.** UBL3 (red) is anchored to in the cell membrane and interacts with MARCH1 (green). By binding an E2 enzyme (blue), it recruits it to the membrane and promotes transfer of ubiquitin (Ub) from the loaded E2 enzyme to the beta chain of MHC II (grey), resulting in ubiquitinated MHC II.

**Supplementary Table 1. Enriched proteins in Myc-UBL3 expressing MutuDC compared to  $\Delta Ubl3$ .** Differential expression analysis was performed using the Bioconductor package limma, with adjustment for multiple testing using the Benjamini-Hochberg false discovery rate (FDR) method. Proteins were considered significantly enriched with an adjusted p-value cut-off  $<0.05$  and log2 fold change  $>1$  (see methods) over  $\Delta Ubl3$  control. FC = fold change, asterisk denotes hits also detected in Myc-UBL3<sub>C114S</sub> samples.

| <b>FC</b>   | <b>log<sub>10</sub>(p value)</b> | <b>gene</b>      | <b>name</b>                                              |
|-------------|----------------------------------|------------------|----------------------------------------------------------|
| <b>9.78</b> | 3.78                             | <b>Ifi205a</b>   | Interferon-activable protein 205-A                       |
| <b>9.58</b> | 3.22                             | <b>Ubl3</b>      | Ubiquitin-like protein 3                                 |
| <b>9.19</b> | 4.13                             | <b>Clasrp*</b>   | CLK4-associating serine/arginine rich protein            |
| <b>9.06</b> | 3.16                             | <b>Hdac1</b>     | Histone deacetylase 1                                    |
| <b>8.28</b> | 4.44                             | <b>Utp18*</b>    | U3 small nucleolar RNA-associated protein 18 homologue   |
| <b>7.89</b> | 2.93                             | <b>Cct4</b>      | T-complex protein 1 subunit delta                        |
| <b>7.78</b> | 3.25                             | <b>Pdia6</b>     | Protein disulfide-isomerase A6                           |
| <b>7.41</b> | 3.05                             | <b>Lmnb1</b>     | Lamin-B1                                                 |
| <b>7.11</b> | 2.92                             | <b>Psap</b>      | Prosaposin                                               |
| <b>6.41</b> | 3.03                             | <b>Vasp</b>      | Vasodilator-stimulated phosphoprotein                    |
| <b>6.19</b> | 3.78                             | <b>Sp110*</b>    | Sp110 nuclear body protein                               |
| <b>5.50</b> | 3.15                             | <b>Tcp1</b>      | T-complex protein 1 subunit alpha                        |
| <b>5.35</b> | 2.95                             | <b>Nusap1</b>    | Nucleolar and spindle-associated protein 1               |
| <b>5.13</b> | 3.41                             | <b>Hnrnpul2*</b> | Heterogeneous nuclear ribonucleoprotein U-like protein 2 |
| <b>4.72</b> | 3.14                             | <b>Rab43</b>     | Ras-related protein Rab-43                               |
| <b>4.38</b> | 3.52                             | <b>Dpysl2</b>    | Dihydropyrimidinase-related protein 2                    |
| <b>3.94</b> | 3.27                             | <b>Gnl3l*</b>    | Guanine nucleotide-binding protein-like 3-like protein   |

**Supplementary Table 2. Enriched proteins in Myc-UBL3<sub>C114S</sub> expressing MutuDC compared to  $\Delta Ubl3$ .** Differential expression analysis was performed using the Bioconductor package limma, with adjustment for multiple testing using the Benjamini-Hochberg false discovery rate (FDR) method. Proteins were considered significantly enriched with an adjusted p-value cut-off <0.05 and log<sub>2</sub> fold change >1 (see methods) over  $\Delta Ubl3$  control. FC = fold change

| <b>FC</b>   | <b>log<sub>10</sub>(p value)</b> | <b>gene</b>     | <b>name</b>                                              |
|-------------|----------------------------------|-----------------|----------------------------------------------------------|
| <b>3.48</b> | 4.600                            | <b>Hnrnpul2</b> | Heterogeneous nuclear ribonucleoprotein U-like protein 2 |
| <b>3.10</b> | 4.29                             | <b>Sp110</b>    | Sp110 nuclear body protein                               |
| <b>3.08</b> | 4.01                             | <b>Clasrp</b>   | CLK4-associating serine/arginine rich protein            |
| <b>2.89</b> | 4.26                             | <b>Utp18</b>    | U3 small nucleolar RNA-associated protein 18 homologue   |
| <b>2.08</b> | 3.41                             | <b>Gnl31</b>    | Guanine nucleotide-binding protein-like 3-like protein   |

**Supplementary Table 3. Flow cytometry antibodies used in this study.**

| <b>Antigen/reagent</b>         | <b>Reactivity</b> | <b>Supplier</b>          | <b>Cat. No.</b> | <b>RRID</b> | <b>dilution</b> |
|--------------------------------|-------------------|--------------------------|-----------------|-------------|-----------------|
| C3 (11H9) biotin               | mouse             | Novus                    | NB200-540B      | AB_2744548  | 1:300           |
| CD3 (KT3-1.1) FITC             | mouse             | WEHI antibody facility   | N/A             | N/A         | 1:200           |
| CD3 (145-2C11) PE-Cy7          | mouse             | BioLegend                | 100320          | AB_312685   | 1:200           |
| CD4 (RM4-5) PE-Cy7             | mouse             | BioLegend                | 100528          | AB_312729   | 1:400           |
| CD8 $\alpha$ (53-6.7) BV421    | mouse             | BioLegend                | 100738          | AB_11204079 | 1:800           |
| CD8 $\alpha$ (53-6.7) APC      | mouse             | BioLegend                | 100712          | AB_312751   | 1:400           |
| CD11b (M1/70) PE               | mouse             | WEHI antibody facility   | N/A             | N/A         | 1:800           |
| CD11b (M1/70) BV510            | mouse             | BioLegend                | 101245          | AB_2561390  | 1:200           |
| CD11b (M1/70) PE-Cy7           | mouse             | BioLegend                | 101216          | AB_312799   | 1:200           |
| CD11c (N418) PE-Cy7            | mouse             | BioLegend                | 117318          | AB_493568   | 1:400           |
| CD11c (N418) BV510             | mouse             | BioLegend                | 117338          | AB_2562016  | 1:200           |
| CD19 (1D3) FITC                | mouse             | WEHI antibody facility   | N/A             | N/A         | 1:800           |
| CD19 (1D3) BB700               | mouse             | BD Biosciences           | 566411          | AB_2744315  | 1:200           |
| CD24 (M1/69) FITC              | mouse             | WEHI antibody facility   | N/A             | N/A         | 1:300           |
| CD24 (M1/69) PE                | mouse             | WEHI antibody facility   | N/A             | N/A         | 1:100           |
| CD25 (PC61) Biotin             | mouse             | WEHI antibody facility   | N/A             | N/A         | 1:200           |
| CD31 (390) BUV805              | mouse             | BD Biosciences           | 741939          | AB_2871251  | 1:200           |
| CD40 (FGK45.5) APC             | mouse             | Miltenyi Biotec          | 130-102-547     | AB_2660762  | 1:100           |
| CD45 (30-F11) PerCP-Cy5.5      | mouse             | BioLegend                | 103132          | AB_893340   | 1:100           |
| CD45 (30-F11) BV786            | mouse             | BD Biosciences           | 564225          | AB_2716861  | 1:200           |
| CD45R/B220 (RA3-6B2) BV510     | mouse             | BioLegend                | 103248          | AB_2650679  | 1:100           |
| CD64 (X54-5/7.1) APC           | mouse             | BioLegend                | 139305          | AB_11219205 | 1:200           |
| CD80 (16-10A1) PE              | mouse             | BD Biosciences           | 553769          | AB_395039   | 1:200           |
| CD86 (GL1) APC                 | mouse             | BioLegend                | 105012          | AB_493342   | 1:400           |
| CD86 (GL1) BV605               | mouse             | BioLegend                | 105037          | AB_11204429 | 1:400           |
| CD86 (GL1) FITC                | mouse             | BioLegend                | 105006          | AB_313149   | 1:200           |
| CD86 (GL1) BV650               | mouse             | BioLegend                | 105035          | AB_11126147 | 1:200           |
| CD135/Flt3 (A2F10) PE          | mouse             | BioLegend                | 135306          | AB_1877217  | 1:400           |
| CD172/Sirp $\alpha$ (P84) FITC | mouse             | BioLegend                | 144005          | AB_11204432 | 1:200           |
| CD205/DEC205 (NLDC-145) PE     | mouse             | WEHI antibody facility   | N/A             | N/A         | 1:200           |
| CD274/PD-L1 (10F.9G2) BV421    | mouse             | BioLegend                | 124315          | AB_10897097 | 1:200           |
| CD317/BST2 (927) FITC          | mouse             | BioLegend                | 127008          | AB_2028462  | 1:200           |
| CD326/EpCAM (G8.8) APC-Cy7     | mouse             | BioLegend                | 118218          | AB_2098648  | 1:100           |
| CD326/EpCAM (G8.8) PerCP-Cy5.5 | mouse             | BioLegend                | 118219          | AB_2098647  | 1:100           |
| CD357/GITR (DTA-1) APC         | mouse             | Thermo Fisher Scientific | 17-5874-81      | AB_469461   | 1:200           |

|                                             |       |                          |            |             |        |
|---------------------------------------------|-------|--------------------------|------------|-------------|--------|
| CD370/Clec9A (7H11) APC                     | mouse | BioLegend                | 143506     | AB_2566380  | 1:200  |
| F4/80 (F4/80) AF633                         | mouse | WEHI antibody facility   | N/A        | N/A         | 1:100  |
| Foxp3 (FJK-16s) eF450                       | mouse | Thermo Fisher Scientific | 48-5773-82 | AB_1518812  | 1:800  |
| IgD (11-26c.2a) FITC                        | mouse | BD Biosciences           | 553439     | AB_394859   | 1:200  |
| IgM (RMM-1) PE-Cy7                          | mouse | BioLegend                | 406515     | AB_10690815 | 1:200  |
| Ly6A.2/E.1/Sca-1 (D7) APC                   | mouse | BioLegend                | 108111     | AB_313348   | 1:200  |
| Ly6C.2 (5075-3.6) AF633                     | mouse | WEHI antibody facility   | N/A        | N/A         | 1:100  |
| Ly6G (1A8) FITC                             | mouse | WEHI antibody facility   | N/A        | N/A         | 1:70   |
| Ly6G (1A8) BVU395                           | mouse | BD Biosciences           | 563978     | AB_2716852  | 1:200  |
| Ly51 (6C3) FITC                             | mouse | BioLegend                | 108305     | AB_313362   | 1:100  |
| MerTK (2B10C42) BV421                       | mouse | BioLegend                | 151510     | AB_2832533  | 1:200  |
| MHC I H-2Kb (AF6-88.5) APC                  | mouse | BioLegend                | 116518     | AB_10564404 | 1:400  |
| MHC II I-A/I-E (M5/114) PE                  | mouse | WEHI antibody facility   | N/A        | N/A         | 1:300  |
| MHC-II I-A/I-E (M5/114.15.2) AF700          | mouse | BioLegend                | 107622     | AB_493727   | 1:400  |
| SiglecF (E50-2440) BV650                    | mouse | BD Biosciences           | 740557     | AB_2740258  | 1:200  |
| SiglecH (551) PE                            | mouse | BioLegend                | 129606     | AB_2189147  | 1:200  |
| XCR1 (ZET) PE                               | mouse | BioLegend                | 148203     | AB_2563842  | 1:200  |
| XCR1 (ZET) APC                              | mouse | BioLegend                | 148206     | AB_2563932  | 1:400  |
| Ulex Europaeus Agglutinin I (UEA-1), biotin | N/A   | Vector Labs              | B-1065-2   | N/A         | 1:1200 |
| CD1a (HI149) APC                            | human | BioLegend                | 300110     | AB_314024   | 1:20   |
| CD16 (3G8) FITC                             | human | BioLegend                | 302006     | AB_314206   | 1:20   |
| HLA-DR (LN3) APC-eFluor780                  | human | Thermo Fisher Scientific | 47-9956-42 | AB_1963603  | 1:20   |
| CD86 (IT2.2) PE-Cy7                         | human | BioLegend                | 305422     | AB_2074981  | 1:20   |
| HLA-A,B,C (W6/32) PerCp-Cy5.5               | human | BioLegend                | 311420     | AB_10709152 | 1:20   |

**Supplementary Table 4. Western blot antibodies used in this study.**

| <b>Antibody</b>                          | <b>Supplier</b>           | <b>Cat. No.</b> | <b>RRID</b> | <b>dilution</b> |
|------------------------------------------|---------------------------|-----------------|-------------|-----------------|
| Rabbit anti-mouse Ubl3                   | Novus                     | ab113820        | AB_10860670 | 1:1000          |
| Mouse anti-human UBL3                    | LSbio                     | LS-C661402      | AB_2885185  | 1:1000          |
| Rabbit anti-Myc-tag (71D10)              | Cell Signaling Technology | 2278            | AB_490778   | 1:1000          |
| Rabbit anti-mouse actin (20-33)          | Sigma-Aldrich             | A5060           | AB_476738   | 1:2000          |
| Mouse anti-human actin (C4)              | Millipore                 | MAB1501         | AB_2223041  | 1:1000          |
| Rat anti-ubiquitin (P4D1) HRP            | Santa Cruz Biotechnology  | sc-8017         | AB_628423   | 1:1000          |
| Rabbit anti-mouse MHCII beta chain (JV2) | WEHI antibody facility    | N/A             | N/A         | 1:1000          |

**Supplementary Table 5. Immunofluorescence antibodies used in this study.**

| <b>Antibody</b>                   | <b>Supplier</b>        | <b>Cat. No.</b> | <b>RRID</b> | <b>dilution</b> |
|-----------------------------------|------------------------|-----------------|-------------|-----------------|
| anti-Myc-tag (clone 9E10)         | BioLegend              | 626802          | AB_2148451  | 1:200           |
| anti-MHC II (clone M5/114)        | WEHI antibody facility | N/A             | N/A         | 1:200           |
| goat anti-mouse Alexa Fluor 594   | Thermo Fisher          | A-11032         | AB_2534091  | 1:1000          |
| Alexa Fluor 647-conjugated avidin | produced in-house      | N/A             | N/A         | 1:800           |

## Supplementary Methods

### Isolation and protein content of small extracellular vesicles

Serum samples were diluted with the same volume of filtered (0.22  $\mu\text{m}$ ) PBS (no calcium, no magnesium) and centrifuged at 500g for 30 min at 4°C. Supernatant was collected, diluted with filtered PBS and centrifuged at 11,300 rpm for 45min, 4°C using a benchtop ultracentrifuge. Supernatants were collected and centrifuged at 100,000g for 90 minutes at 4°C. Supernatants were removed and pellets resuspended in PBS. For protein measurements, micro BCA™ Protein Assay Kit was utilised in 96-well format according to the user protocol. 150  $\mu\text{l}$  of each sample was analysed in triplicate using the ClarioStar plate reader.

### Nanoparticle tracking analysis of isolated EVs using Zetaview

Small EVs were analyzed for size and concentration via Zetaview installed with a 405 nm laser diode (Particle Metrix, PMX-120). Vesicles were prepared with a 1:2,000 (WT) and 1:4,000 (Ubl3) dilution in dPBS. For each cycle, 11 positions were taken with the following analysis parameters: camera sensitivity: 80, max area: 1000, min area: 5, min brightness: 30, min tracelength 15. dPBS was analyzed for background.

### Transmission electron microscopy

For imaging Extracellular Vesicles (EV's) using transmission electron microscopy (TEM), EV's suspended in dPBS was applied to formvar-coated grid with heavy carbon coating after fixation in glutaraldehyde (2% v/w in H<sub>2</sub>O) for 30 mins room temperature. Samples were visualised by negative staining with uranyl acetate (2% w/v in H<sub>2</sub>O), with images captured using a Joel JEM-2100 electron microscope.

### Mass spectrometry analysis

$\Delta Ubl3$  MutuDC or  $\Delta Ubl3$  MutuDC expressing either Myc-UBL3<sub>WT</sub> or Myc-UBL3<sub>C114S</sub> were lysed in 1% Triton buffer on ice and nuclei removed by centrifugation at 14,000  $\times$  g at 4 °C. Postnuclear supernatants of 5  $\times$  10<sup>6</sup> cells were incubated with anti-Myc-Tag (9B11) mouse mAb conjugated to magnetic beads (Cell Signaling Technologies) at 4 °C, washed and eluted by acidification with 0.1% FA and denatured with 2,2,2-trifluoroethanol. Proteins were reduced with 12.5 mM tris(2-carboxyethyl)phosphine (TCEP), and digested with 0.25 mg proteomics grade Trypsin (Sigma-Aldrich) in 50 mM triethylammonium bicarbonate (TEAB)) overnight at 37 °C. Peptides were dried by SpeedVac, reconstituted in 2% acetonitrile and 0.05% trifluoroacetic acid, centrifuged for 10 minutes at 21,000  $\times$  g to remove particulate matter, and filtered over Vivacon 500 30kDa columns (Satororius).



Samples were analyzed by liquid chromatography tandem mass spectrometry (LC-MS/MS) using Q-Exactive Plus mass spectrometer (Thermo Scientific) fitted with nanoflow reverse-phase high performance liquid chromatography (HPLC) (Ultimate 3000 RSLC, Dionex). The nano-LC system was equipped with an Acclaim Pepmap nano-trap column (Dionex – C18, 100 Å, 75 µm × 2 cm) and an Acclaim Pepmap RSLC analytical column (Dionex – C18, 100 Å, 75 µm × 50 cm). The peptide mix was loaded onto the enrichment (trap) column at an isocratic flow of 5 µL/min of 3% acetonitrile containing 0.1% formic acid. Eluents used were 0.1% v/v formic acid in water (solvent A) and 100% acetonitrile/0.1% formic acid v/v (solvent B). All spectra were acquired in positive mode with full scan MS spectra scanning from m/z 375-1400 at 70000 resolution with AGC target of 3e6 with a maximum accumulation time of 50 ms. The 15 most intense peptide ions with charge state  $\geq 2$ -5 were isolated with an isolation window of 1.2 m/z and fragmented with a normalized collision energy of 30 at 17500 resolution with AGC target of 5e4 with a maximum accumulation time of 50ms. Underfill threshold was set to 2% for triggering of precursor for MS2. Dynamic exclusion was activated for 30s.

Raw MS files were processed with the MaxQuant software (ver. v1.6.17.0) using the integrated Andromeda search engine with false discovery ratio (FDR) < 0.01 at the protein and peptide levels against the mouse proteome (Uniprot proteome id UP000000589—*Mus musculus*, downloaded 09-03-2021). The search included variable modifications for oxidized methionine (M), and up to two missed cleavages were allowed for trypsin digestion. Protein quantification was performed with the included MaxLFQ option, and the resulting protein group output was analyzed using the LfqAnalyst portal<sup>1</sup> using the LFQ intensity values. Missing values were replaced by values drawn from a normal distribution of 1.8 standard deviations and a width of 0.3 for each sample (Perseus-type). Protein-wise linear models combined with empirical Bayes statistics were used for differential expression analysis using Bioconductor package Limma whereby the adjusted *p*-value cutoff was set at 0.05 and log<sub>2</sub> fold change cutoff set at 1. The Benjamini-Hochberg (BH) method of FDR correction was used.

### Supplementary References

1. Shah, A. D., Goode, R. J. A., Huang, C., Powell, D. R. & Schittenhelm, R. B. Lfq-Analyst: An Easy-To-Use Interactive Web Platform To Analyze and Visualize Label-Free Proteomics Data Preprocessed with MaxQuant. *J. Proteome Res.* **19**, 204–211 (2020).
