# Supplementary material for: Ubiquitin-like protein 3 (UBL3) is required for MARCH ubiquitination of major histocompatibility complex class II and CD86
Source: PubMed Central journal article supplement (PMC9001657; doi:10.1038/s41467-022-29524-w), 2022-04-11
Supplement: 41467_2022_29524_MOESM2_ESM.pdf [file 41467_2022_29524_MOESM2_ESM.pdf]

## Reporting Summary

Nature Research wishes to improve the reproducibility of the work that we publish. This form provides structure for consistency and transparency in reporting. For further information on Nature Research policies, see our [Editorial Policies](#) and the [Editorial Policy Checklist](#).

### Statistics

For all statistical analyses, confirm that the following items are present in the figure legend, table legend, main text, or Methods section.

n/a Confirmed

- The exact sample size ( $n$ ) for each experimental group/condition, given as a discrete number and unit of measurement
- A statement on whether measurements were taken from distinct samples or whether the same sample was measured repeatedly
- The statistical test(s) used AND whether they are one- or two-sided  
*Only common tests should be described solely by name; describe more complex techniques in the Methods section.*
- A description of all covariates tested
- A description of any assumptions or corrections, such as tests of normality and adjustment for multiple comparisons
- A full description of the statistical parameters including central tendency (e.g. means) or other basic estimates (e.g. regression coefficient) AND variation (e.g. standard deviation) or associated estimates of uncertainty (e.g. confidence intervals)
- For null hypothesis testing, the test statistic (e.g.  $F$ ,  $t$ ,  $r$ ) with confidence intervals, effect sizes, degrees of freedom and  $P$  value noted  
*Give  $P$  values as exact values whenever suitable.*
- For Bayesian analysis, information on the choice of priors and Markov chain Monte Carlo settings
- For hierarchical and complex designs, identification of the appropriate level for tests and full reporting of outcomes
- Estimates of effect sizes (e.g. Cohen's  $d$ , Pearson's  $r$ ), indicating how they were calculated

*Our web collection on [statistics for biologists](#) contains articles on many of the points above.*

### Software and code

Policy information about [availability of computer code](#)

Data collection

Flow cytometric data was obtained using FACSDiva version 9.0.1 (BD) and exported into FCS 3.0. Sequencing data collection for the CRISPR library were performed according to the instructions of the Illumina NextSeq 500 system. Western blot data was collected using ImageLab version 5.2.1 (Bio-Rad). Microscopy data was obtained using the LAS X software platform version 3.1.1. Mass Spectrometry data was obtained according to the instructions of the Q-Exactive system.

Data analysis

The CRISPR library screen was analysed in R using the edgeR package (<https://bioconductor.org/packages/release/bioc/html/edgeR.html>), flow cytometry data was analysed in Flowjo v9 and v10, microscopy data was analysed with the FIJI distribution of ImageJ (2.0.0-rc-69/1.52p) (confocal microscopy), or Imaris v9.7 (proximity ligation assay). Statistical analysis of flow cytometric and western blot imaging data was performed in Prism versions v6, v8, and v9.0.0 (Graphpad). Mass Spectrometry data was analysed using MaxQuant software (ver. v1.6.17.0) and the LFQAnalyst portal (<https://bioinformatics.erc.monash.edu/apps/LFQ-Analyst/> - accessed 14/07/2021)

For manuscripts utilizing custom algorithms or software that are central to the research but not yet described in published literature, software must be made available to editors and reviewers. We strongly encourage code deposition in a community repository (e.g. GitHub). See the Nature Research [guidelines for submitting code & software](#) for further information.

## Data

Policy information about [availability of data](#)

All manuscripts must include a [data availability statement](#). This statement should provide the following information, where applicable:

- Accession codes, unique identifiers, or web links for publicly available datasets
- A list of figures that have associated raw data
- A description of any restrictions on data availability

Source data underlying Figures 1a-b, 2b, 3a-b, 3d, 4a-i, 5a-b, 6a-d, 7a-e, 8, and Supplementary Figures 2a-c, 3c, 5, 6a-b, and 7c are provided as Source Data file. Proteomics data have been deposited to the ProteomeXchange Consortium via jPOST (accession codes JPST001444, PXD030790). The fasta file containing the mouse reference proteome used for the analysis of raw MS data using MaxQuant was retrieved from Uniprot (proteome id UP000000589, downloaded 09-03-2021).

## Field-specific reporting

Please select the one below that is the best fit for your research. If you are not sure, read the appropriate sections before making your selection.

- Life sciences       Behavioural & social sciences       Ecological, evolutionary & environmental sciences

For a reference copy of the document with all sections, see [nature.com/documents/nr-reporting-summary-flat.pdf](https://www.nature.com/documents/nr-reporting-summary-flat.pdf)

## Life sciences study design

All studies must disclose on these points even when the disclosure is negative.

|                 |                                                                                                                                                                                                                                                                                                                                                                                                                                                                                                                                                                                                                                                                                                                                                 |
|-----------------|-------------------------------------------------------------------------------------------------------------------------------------------------------------------------------------------------------------------------------------------------------------------------------------------------------------------------------------------------------------------------------------------------------------------------------------------------------------------------------------------------------------------------------------------------------------------------------------------------------------------------------------------------------------------------------------------------------------------------------------------------|
| Sample size     | All relevant sample sizes are described in the legends in the figure and/or the materials and methods section. Sample sizes were determined based on prior experiences with each of the experimental systems and their expected variability. No statistical testing was used to pre-determine sample size.                                                                                                                                                                                                                                                                                                                                                                                                                                      |
| Data exclusions | After optimising experimental conditions, all data that met predetermined quality control expectations (e.g. sufficient staining, successful injection) were included.                                                                                                                                                                                                                                                                                                                                                                                                                                                                                                                                                                          |
| Replication     | Figure 1. The CRISPR KO library analysis in Fig 1 was done using 3 independent library transductions to ensure reproducibility. Additionally, this screen (using the GECKO v2 library) is a replication of a pilot experiment using an older generation library (unpublished, not included in the study) which showed similar results. All other experiments in the study were replicated by at least 2 independent experiments (except figures 2a, 3b, 4f,g,i, 6a(right),d, 7c and 8, and supplementary figures 2+3 as noted in the legends). All attempts at replication of experiments were successful. In addition, experiments using the UBL3cell lines Fig 3a+d were replicated successfully in a different clone of UBL3KO MutuDC cells. |
| Randomization   | No randomisation was done as no experimental groups were used in this study.                                                                                                                                                                                                                                                                                                                                                                                                                                                                                                                                                                                                                                                                    |
| Blinding        | No blinding was used in our experiments, since the readouts were quantitative and not prone to subjective judgement of investigators. However the CRISPR KO screen was unbiased in nature.                                                                                                                                                                                                                                                                                                                                                                                                                                                                                                                                                      |

## Reporting for specific materials, systems and methods

We require information from authors about some types of materials, experimental systems and methods used in many studies. Here, indicate whether each material, system or method listed is relevant to your study. If you are not sure if a list item applies to your research, read the appropriate section before selecting a response.

### Materials & experimental systems

| n/a                                 | Included in the study                                           |
|-------------------------------------|-----------------------------------------------------------------|
| <input type="checkbox"/>            | <input checked="" type="checkbox"/> Antibodies                  |
| <input type="checkbox"/>            | <input checked="" type="checkbox"/> Eukaryotic cell lines       |
| <input checked="" type="checkbox"/> | <input type="checkbox"/> Palaeontology and archaeology          |
| <input type="checkbox"/>            | <input checked="" type="checkbox"/> Animals and other organisms |
| <input checked="" type="checkbox"/> | <input type="checkbox"/> Human research participants            |
| <input checked="" type="checkbox"/> | <input type="checkbox"/> Clinical data                          |
| <input checked="" type="checkbox"/> | <input type="checkbox"/> Dual use research of concern           |

### Methods

| n/a                                 | Included in the study                              |
|-------------------------------------|----------------------------------------------------|
| <input checked="" type="checkbox"/> | <input type="checkbox"/> ChIP-seq                  |
| <input type="checkbox"/>            | <input checked="" type="checkbox"/> Flow cytometry |
| <input checked="" type="checkbox"/> | <input type="checkbox"/> MRI-based neuroimaging    |

## Antibodies

Antibodies used      Following antibodies were used (with RRIDs provided for all commercially obtained antibodies).

## Flow cytometry (mouse antigens):

C3 (11H9) biotin (Novus Cat# NB200-540B, RRID:AB\_2744548) 1:300  
 CD3 (KT3-1.1) FITC (WEHI antibody facility, no Cat# available) 1:200  
 CD3 (145-2C11) PE-Cy7 (BioLegend Cat# 100320, RRID:AB\_312685) 1:200  
 CD4 (RM4-5) PE-Cy7 (BioLegend Cat# 100528, RRID:AB\_312729) 1:400  
 CD8 $\alpha$  (53-6.7) BV421 (BioLegend Cat# 100738, RRID:AB\_11204079) 1:800  
 CD8 $\alpha$  (53-6.7) APC (BioLegend Cat# 100712, RRID:AB\_312751) 1:400  
 CD11b (M1/70) PE (WEHI antibody facility) 1:800  
 CD11b (M1/70) BV510 (BioLegend Cat# 101245, RRID:AB\_2561390) 1:200  
 CD11b (M1/70) PE-Cy7 (BioLegend Cat# 101216, RRID:AB\_312799) 1:200  
 CD11c (N418) PE-Cy7 (BioLegend Cat# 117318, RRID:AB\_493568) 1:400  
 CD11c (N418) BV510 (BioLegend Cat# 117338, RRID:AB\_2562016) 1:200  
 CD19 (1D3) FITC (WEHI antibody facility) 1:800  
 CD19 (1D3) BB700 (BD Biosciences Cat# 566411, RRID:AB\_2744315) 1:200  
 CD24 (M1/69) FITC (WEHI antibody facility) 1:300  
 CD24 (M1/69) PE (WEHI antibody facility) 1:100  
 CD25 (PC61) Biotin (WEHI antibody facility) 1:200  
 CD31 (390) BUV805 (BD Biosciences Cat# 741939, RRID:AB\_2871251) 1:200  
 CD40 (FGK45.5) APC (Miltenyi Biotec Cat# 130-102-547, RRID:AB\_2660762) 1:100  
 CD45 (30-F11) PerCP-Cy5.5 (BioLegend Cat# 103132, RRID:AB\_893340) 1:100  
 CD45 (30-F11) BV786 (BD Biosciences Cat# 564225, RRID:AB\_2716861) 1:200  
 CD45R/B220 (RA3-6B2) BV510 (BioLegend Cat# 103248, RRID:AB\_2650679) 1:100  
 CD64 (X54-5/7.1) APC (BioLegend Cat# 139305, RRID:AB\_11219205) 1:200  
 CD80 (16-10A1) PE (BD Biosciences Cat# 553769, RRID:AB\_395039) 1:200  
 CD86 (GL1) APC (BioLegend Cat# 105012, RRID:AB\_493342) 1:400  
 CD86 (GL1) BV605 (BioLegend Cat# 105037, RRID:AB\_11204429) 1:400  
 CD86 (GL1) FITC (BioLegend Cat# 105006, RRID:AB\_313149) 1:200  
 CD86 (GL1) BV650 (BioLegend Cat# 105035, RRID:AB\_11126147) 1:200  
 CD135/Flt3 (A2F10) PE (BioLegend Cat# 135306, RRID:AB\_1877217) 1:400  
 CD172/Sirp $\alpha$  (P84) FITC (BioLegend Cat# 144005, RRID:AB\_11204432) 1:200  
 CD205/DEC205 (NLDC-145) PE (WEHI antibody facility) 1:200  
 CD274/PD-L1 (10F.9G2) BV421 (BioLegend Cat# 124315, RRID:AB\_10897097) 1:200  
 CD317/BST2 (927) FITC (BioLegend Cat# 127008, RRID:AB\_2028462) 1:200  
 CD326/EpCAM (G8.8) APC-Cy7 (BioLegend Cat# 118218, RRID:AB\_2098648) 1:100  
 CD326/EpCAM (G8.8) PerCP-Cy5.5 (BioLegend Cat# 118219, RRID:AB\_2098647) 1:100  
 CD357/GITR (DTA-1) APC (Thermo Fisher Scientific Cat# 17-5874-81, RRID:AB\_469461) 1:200  
 CD370/Clec9A (7H11) APC (BioLegend Cat# 143506, RRID:AB\_2566380) 1:200  
 F4/80 (F4/80) AF633 (WEHI antibody facility) 1:100  
 Foxp3 (FJK-16s) eF450 (Thermo Fisher Scientific Cat# 48-5773-82, RRID:AB\_1518812) 1:800  
 IgD (11-26c.2a) FITC (BD Biosciences Cat# 553439, RRID:AB\_394859) 1:200  
 IgM (RMM-1) PE-Cy7 (BioLegend Cat# 406515, RRID:AB\_10690815) 1:200  
 Ly6A.2/E.1/Sca-1 (D7) APC (BioLegend Cat# 108111, RRID:AB\_313348) 1:200  
 Ly6C.2 (5075-3.6) AF633 (WEHI antibody facility) 1:100  
 Ly6G (1A8) FITC (WEHI antibody facility) 1:70  
 Ly6G (1A8) BUV395 (BD Biosciences Cat# 563978, RRID:AB\_2716852) 1:200  
 Ly51 (6C3) FITC (BioLegend Cat# 108305, RRID:AB\_313362) 1:100  
 MerTK (2B10C42) BV421 (BioLegend Cat# 151510, RRID:AB\_2832533) 1:200  
 MHC I H-2Kb (AF6-88.5) APC (BioLegend Cat# 116518, RRID:AB\_10564404) 1:400  
 MHC II I-A/I-E (M5/114) PE (WEHI antibody facility) 1:300  
 MHC-II I-A/I-E (M5/114.15.2) AF700 (BioLegend Cat# 107622, RRID:AB\_493727) 1:400  
 SiglecF (E50-2440) BV650 (BD Biosciences Cat# 740557, RRID:AB\_2740258) 1:200  
 SiglecH (551) PE (BioLegend Cat# 129606, RRID:AB\_2189147) 1:200  
 XCR1 (ZET) PE (BioLegend Cat# 148203, RRID:AB\_2563842) 1:200  
 XCR1 (ZET) APC (BioLegend Cat# 148206, RRID:AB\_2563932) 1:400

## Validation

Flow cytometry: antibodies were titrated in house prior to using in experiments on C57BL/6 splenocytes (mouse antigens) or human PBMCs (human antigens). Additionally, all commercially obtained antibodies used were validated for flow cytometry by their respective manufacturers:

## Mouse antigens

CD3 (145-2C11) PE-Cy7 (BioLegend Cat# 100320, RRID:AB\_312685) <https://www.biolegend.com/en-us/products/pe-cyanine7-anti-mouse-cd3epsilon-antibody-1899>  
 CD4 (RM4-5) PE-Cy7 (BioLegend Cat# 100528, RRID:AB\_312729) <https://www.biolegend.com/en-us/products/pe-cyanine7-anti-mouse-cd4-antibody-1932>  
 CD8 $\alpha$  (53-6.7) BV421 (BioLegend Cat# 100738, RRID:AB\_11204079) <https://www.biolegend.com/en-us/products/brilliant-violet-421-anti-mouse-cd8a-antibody-7138>  
 CD8 $\alpha$  (53-6.7) APC (BioLegend Cat# 100712, RRID:AB\_312751) <https://www.biolegend.com/en-us/products/apc-anti-mouse-cd8a-antibody-150>  
 CD11b (M1/70) BV510 (BioLegend Cat# 101245, RRID:AB\_2561390) <https://www.biolegend.com/en-us/products/brilliant-violet-510-anti-mouse-human-cd11b-antibody-7993>  
 CD11b (M1/70) PE-Cy7 (BioLegend Cat# 101216, RRID:AB\_312799) <https://www.biolegend.com/en-us/products/pe-cyanine7-anti-mouse-human-cd11b-antibody-1921>  
 CD11c (N418) PE-Cy7 (BioLegend Cat# 117318, RRID:AB\_493568) <https://www.biolegend.com/en-us/products/pe-cyanine7-anti-mouse-cd11c-antibody-3086>  
 CD11c (N418) BV510 (BioLegend Cat# 117318, RRID:AB\_2562016) <https://www.biolegend.com/en-us/products/pe-cyanine7-anti-mouse-cd11c-antibody-3086>

CD19 (1D3) BB700 (BD Biosciences Cat# 566411, RRID:AB\_2744315) <https://wwwbdbiosciences.com/en-au/products/reagents/flow-cytometry-reagents/research-reagents/single-color-antibodies-ruo/bb700-rat-anti-mouse-cd19.566412>  
 CD31 (390) BUV805 (BD Biosciences Cat# 741939, RRID:AB\_2871251) <https://wwwbdbiosciences.com/en-au/products/reagents/flow-cytometry-reagents/research-reagents/single-color-antibodies-ruo/buv805-rat-anti-mouse-cd31.741939>  
 CD40 (FGK45.5) APC (Miltenyi Biotec Cat# 130-102-547, RRID:AB\_2660762) <https://www.miltenyibiotec.com/AD-en/products/cd40-antibody-anti-mouse-fgk45-5.html#pure-functional-grade:1-mg-in-0-5-ml>  
 CD45 (30-F11) PerCP-Cy5.5 (BioLegend Cat# 103132, RRID:AB\_893340) <https://www.biolegend.com/en-us/products/percp-cyanine5-5-anti-mouse-cd45-antibody-4264>  
 CD45 (30-F11) BV786 (BD Biosciences Cat# 564225, RRID:AB\_2716861) <https://wwwbdbiosciences.com/en-tw/products/reagents/flow-cytometry-reagents/research-reagents/single-color-antibodies-ruo/bv786-rat-anti-mouse-cd45.564225>  
 CD45R/B220 (RA3-6B2) BV510 (BioLegend Cat# 103248, RRID:AB\_2650679) <https://www.biolegend.com/en-us/products/brilliant-violet-510-anti-mouse-human-cd45r-b220-antibody-7996>  
 CD64 (X54-5/7.1) APC (BioLegend Cat# 139305, RRID:AB\_11219205) <https://www.biolegend.com/en-us/products/apc-anti-mouse-cd64-fcgammari-antibody-7874>  
 CD80 (16-10A1) PE (BD Biosciences Cat# 553769, RRID:AB\_395039) <https://wwwbdbiosciences.com/en-us/products/reagents/flow-cytometry-reagents/research-reagents/single-color-antibodies-ruo/pe-hamster-anti-mouse-cd80.553769>  
 CD86 (GL1) APC (BioLegend Cat# 105012, RRID:AB\_493342) <https://www.biolegend.com/en-us/products/apc-anti-mouse-cd86-antibody-2896>  
 CD86 (GL1) BV605 (BioLegend Cat# 105035, RRID:AB\_11126147) <https://www.biolegend.com/en-us/products/brilliant-violet-650-anti-mouse-cd86-antibody-7643>  
 CD86 (GL1) FITC (BioLegend Cat# 105006, RRID:AB\_313149) <https://www.biolegend.com/en-us/products/fitc-anti-mouse-cd86-antibody-254>  
 CD86 (GL1) BV650 (BioLegend Cat# 105035, RRID:AB\_11126147) <https://www.biolegend.com/en-us/products/brilliant-violet-650-anti-mouse-cd86-antibody-7643>  
 CD135/Flt3 (A2F10) PE (BioLegend Cat# 135306, RRID:AB\_1877217) <https://www.biolegend.com/en-us/products/pe-anti-mouse-cd135-antibody-6173>  
 CD172/Sirpα (P84) FITC (BioLegend Cat# 144005, RRID:AB\_11204432) <https://www.biolegend.com/en-us/products/fitc-anti-mouse-cd172a-sirpalph-antibody-7829>  
 CD274/PD-L1 (10F.9G2) BV421 (BioLegend Cat# 124315, RRID:AB\_10897097) <https://www.biolegend.com/en-us/products/brilliant-violet-421-anti-mouse-cd274-b7-h1-pd-l1-antibody-7250>  
 CD317/BST2 (927) FITC (BioLegend Cat# 127008, RRID:AB\_2028462) <https://www.biolegend.com/en-us/products/fitc-anti-mouse-cd317-bst2-pdca-1-antibody-6349>  
 CD326/EpCAM (G8.8) APC-Cy7 (BioLegend Cat# 118218, RRID:AB\_2098648) <https://www.biolegend.com/en-us/products/apc-cyanine7-anti-mouse-cd326-ep-cam-antibody-5577>  
 CD326/EpCAM (G8.8) PerCP-Cy5.5 (BioLegend Cat# 118219, RRID:AB\_2098647) <https://www.biolegend.com/en-us/products/percp-cyanine5-5-anti-mouse-cd326-ep-cam-antibody-5602>  
 CD357/GITR (DTA-1) APC (Thermo Fisher Scientific Cat# 17-5874-81, RRID:AB\_469461) <https://www.thermofisher.com/antibody/product/CD357-AITR-GITR-Antibody-clone-DTA-1-Monoclonal/17-5874-81>  
 CD370/Clec9A (7H11) APC (BioLegend Cat# 143506, RRID:AB\_2566380) <https://www.biolegend.com/en-us/products/apc-anti-mouse-cd370-clec9a-dngr1-antibody-12367>  
 Foxp3 (FJK-16s) eF450 (Thermo Fisher Scientific Cat# 48-5773-82, RRID:AB\_1518812) <https://www.thermofisher.com/antibody/product/FOXP3-Antibody-clone-FJK-16s-Monoclonal/48-5773-82>  
 IgD (11-26c.2a) FITC (BD Biosciences Cat# 553439, RRID:AB\_394859) <https://wwwbdbiosciences.com/en-us/products/reagents/flow-cytometry-reagents/research-reagents/single-color-antibodies-ruo/fitc-rat-anti-mouse-igd.553439>  
 IgM (RMM-1) PE-Cy7 (BioLegend Cat# 406515, RRID:AB\_10690815) <https://www.biolegend.com/en-us/products/apc-cyanine7-anti-mouse-igm-6957>  
 Ly6A.2/E.1/Sca-1 (D7) APC (BioLegend Cat# 108111, RRID:AB\_313348) <https://www.biolegend.com/en-us/products/apc-anti-mouse-ly-6a-e-sca-1-antibody-225>  
 Ly6G (1A8) BUV395 (BD Biosciences Cat# 563978, RRID:AB\_2716852) <https://wwwbdbiosciences.com/en-us/products/reagents/flow-cytometry-reagents/research-reagents/single-color-antibodies-ruo/buv395-rat-anti-mouse-ly-6g.563978>  
 Ly51 (6C3) FITC (BioLegend Cat# 108305, RRID:AB\_313362) <https://www.biolegend.com/en-us/products/fitc-anti-mouse-ly-51-antibody-177>  
 MerTK (2B10C42) BV421 (BioLegend Cat# 151510, RRID:AB\_2832533) <https://www.biolegend.com/en-us/products/brilliant-violet-421-anti-mouse-merck-mer-antibody-18808>  
 MHC I H-2Kb (AF6-88.5) APC (BioLegend Cat# 116518, RRID:AB\_10564404) <https://www.biolegend.com/en-us/products/apc-anti-mouse-h-2kb-antibody-6573>  
 MHC-II I-A/I-E (M5/114.15.2) AF700 (BioLegend Cat# 107622, RRID:AB\_493727) <https://www.biolegend.com/en-us/products/alex-fluor-700-anti-mouse-i-a-i-e-antibody-3413>  
 SiglecF (E50-2440) BV650 (BD Biosciences Cat# 740557, RRID:AB\_2740258) <https://wwwbdbiosciences.com/en-us/products/reagents/flow-cytometry-reagents/research-reagents/single-color-antibodies-ruo/bv650-rat-anti-mouse-siglec-f.740557>  
 Siglech (551) PE (BioLegend Cat# 129606, RRID:AB\_2189147) <https://www.biolegend.com/en-us/products/pe-anti-mouse-siglec-h-antibody-5178>  
 XCR1 (ZET) PE (BioLegend Cat# 148203, RRID:AB\_2563842) <https://www.biolegend.com/en-us/products/pe-anti-mouse-rat-xcr1-antibody-10217>  
 XCR1 (ZET) APC (BioLegend Cat# 148206, RRID:AB\_2563932) <https://www.biolegend.com/en-us/products/apc-anti-mouse-rat-xcr1-antibody-10222>

Human antigens:

CD1a (HI149) APC (BioLegend Cat# 300110, RRID:AB\_314024) <https://www.biolegend.com/en-us/products/apc-anti-human-cd1a-antibody-703>  
 CD16 (3G8) FITC (BioLegend Cat# 302006, RRID:AB\_314206) <https://www.biolegend.com/en-us/products/fitc-anti-human-cd16-antibody-567>  
 HLA-DR (LN3) APC-eFluor780 (Thermo Fisher Scientific Cat# 47-9956-42, RRID:AB\_1963603) <https://www.thermofisher.com/antibody/product/HLA-DR-Antibody-clone-LN3-Monoclonal/47-9956-42>  
 CD86 (IT2.2) PE-Cy7 (BioLegend Cat# 305422, RRID:AB\_2074981) <https://www.biolegend.com/en-us/products/pe-cyanine7-anti-human-cd86-antibody-3961>

HLA-A,B,C (W6/32) PerCp-Cy5.5 (BioLegend Cat# 311420, RRID:AB\_10709152) <https://www.biolegend.com/en-us/products/percp-cyanine5-5-anti-human-hla-a-b-c-antibody-7057>

Western blot: The rabbit antiserum against MHC II-beta (JV2, WEHI antibody facility) was generated against the C-terminal tail of MHC II-beta and validated by immunoblotting using WT and I-Aa<sup>-/-</sup> mouse splenocytes. The rabbit antibody against UBL3 (Abcam) was validated by Western Blot using WT and Ubl3<sup>-/-</sup> mouse spleen dendritic cells. Commercially sourced antibodies were also validated for Western Blot by their respective manufacturers:

Rabbit anti-mouse Ubl3 (Abcam Cat# ab113820, RRID:AB\_10860670) <http://www.abcam.com/ubl3-antibody-ab113820-references.html>

Mouse anti-human UBL3 (LSbio Cat# LS-C661402, RRID:AB\_2885185) <https://www.lsbio.com/antibodies/ubl3-antibody-elisa-wb-western-ls-c661402/675370>

Rabbit anti-Myc-tag (71D10) (Cell Signaling Technology Cat# 2278, RRID:AB\_490778) <https://www.cellsignal.com/products/primary-antibodies/myc-tag-71d10-rabbit-mab/2278>

Rabbit anti-mouse actin (20-33) (Sigma-Aldrich Cat# A5060, RRID:AB\_476738) <https://www.sigmaaldrich.com/AU/en/product/sigma/a5060>

Mouse anti-human actin (C4) (Millipore Cat# MAB1501, RRID:AB\_2223041) [https://www.merckmillipore.com/DE/de/product/Anti-Actin-Antibody-clone-C4,MM\\_NF-MAB1501](https://www.merckmillipore.com/DE/de/product/Anti-Actin-Antibody-clone-C4,MM_NF-MAB1501)

Rat anti-ubiquitin (P4D1) HRP (Santa Cruz Biotechnology Cat# sc-8017, RRID:AB\_628423) <https://www.scbt.com/p/ubiquitin-antibody-p4d1>

Rabbit anti-mouse MHCII beta chain (JV2) (WEHI antibody facility)

Immunofluorescence antibodies were validated in house by microscopy using the DC1940 mouse cell line. Commercially obtained antibodies used were also validated for immunofluorescence by their respective manufacturers: mouse mAb against Myc-tag (clone 9E10) (BioLegend Cat# 626802, RRID: AB\_2148451) <https://www.biolegend.com/en-us/products/purified-anti-c-myc-antibody-2873>.

## Eukaryotic cell lines

Policy information about [cell lines](#)

|                                                                   |                                                                                                                              |
|-------------------------------------------------------------------|------------------------------------------------------------------------------------------------------------------------------|
| Cell line source(s)                                               | MutuDC 1940 cells were a gift from Hans Acha-Orbea, HEK293 and 293FT cells for lentivirus production were sourced from ATCC. |
| Authentication                                                    | Cell lines were authenticated by flow cytometry for expression of expected markers, and morphological analysis.              |
| Mycoplasma contamination                                          | All cell lines were routinely tested for mycoplasma and were negative.                                                       |
| Commonly misidentified lines (See <a href="#">ICLAC</a> register) | None were used.                                                                                                              |

## Animals and other organisms

Policy information about [studies involving animals](#); [ARRIVE guidelines](#) recommended for reporting animal research

|                         |                                                                                                                                                                                                                                                                                                                                                                                                  |
|-------------------------|--------------------------------------------------------------------------------------------------------------------------------------------------------------------------------------------------------------------------------------------------------------------------------------------------------------------------------------------------------------------------------------------------|
| Laboratory animals      | C57BL/6J (H-2b), Marchf1 <sup>-/-</sup> , Marchf8 <sup>-/-</sup> , and Ubl3 <sup>-/-</sup> age and sex matched mice (either female or male) were used at 6-12 weeks of age. Ubl3 <sup>-/-</sup> mice were generated at the Melbourne Advanced Genome Editing Centre (MAGEC) facility via CRISPR/Cas9 system as described in Methods and Figure 2a. For other strains see methods for references. |
| Wild animals            | No wild animals were used.                                                                                                                                                                                                                                                                                                                                                                       |
| Field-collected samples | No field collected samples were used.                                                                                                                                                                                                                                                                                                                                                            |
| Ethics oversight        | Experimental procedures were approved by the Animal Ethics Committee of the University of Melbourne (protocol no. 1714375).                                                                                                                                                                                                                                                                      |

Note that full information on the approval of the study protocol must also be provided in the manuscript.

## Flow Cytometry

### Plots

Confirm that:

- The axis labels state the marker and fluorochrome used (e.g. CD4-FITC).
- The axis scales are clearly visible. Include numbers along axes only for bottom left plot of group (a 'group' is an analysis of identical markers).
- All plots are contour plots with outliers or pseudocolor plots.
- A numerical value for number of cells or percentage (with statistics) is provided.

## Methodology

### Sample preparation

For isolation of DC or trogocytic B cells from mouse spleen or thymus, organs were finely chopped and digested by manual agitation in the presence of DNase I and collagenase type 3 (please see methods section for details and references), and cell clusters were disrupted by addition of 10 mM EDTA. Light density cells were isolated by density gradient separation in 1.077 g/cm<sup>3</sup> Nycodenz, collected cells were washed and either analysed by flow cytometry (thymus DC, trogocytic B cells) or further enriched (spleen) by incubation in a depletion cocktail, washing with EDTA-BSS+2%FCS, and incubated with BioMag anti-rat IgG-coupled magnetic beads (Qiagen). The DC-enriched supernatant was recovered by magnetic separation.

Mouse spleen, blood and peritoneal cavity cells were treated with red cell removal buffer, and washed with EDTA-BSS+2% FCS prior to staining.

Mouse thymic epithelial cells were enriched as previously described (please see methods section for details and references). In short, single thymi were clipped and mechanically dispersed, followed by sequential digestion with DNase I and liberase. filtered over a nylon mesh and washed with EDTA-BSS+2%FCS prior to staining.

For analysis of mouse lung cells, right ventricles were perfused with PBS and the lungs were collected, finely chopped and digested in liberase and DNase I at 37°C. Tissue was mechanically disrupted by pipetting, filtered over a 70µm strainer, treated with red cell removal buffer, and washed with EDTA-BSS+2%FCS prior to staining.

For thymic Treg analysis, thymi were mashed through a 40µm strainer, washed with EDTA-BSS+2%FCS, and stained with antibodies against surface markers, fixed and permeabilised, before staining for Foxp3.

For human monocyte analysis, buffy coats from healthy donors were obtained from Etablissement Français du Sang (Paris) in accordance with INSERM ethical guidelines. Peripheral Blood Mononuclear Cells (PBMC) were prepared by centrifugation on a Ficoll gradient. Blood CD14+ monocytes were isolated from healthy donors' PBMC by positive selection using magnetic beads.

### Instrument

human samples: FACSVerse (BD), mouse lung samples: CytoFLEX LX (Beckman Coulter), all other samples: LSR Fortessa (BD)

### Software

Data was acquired using FACS Diva (BD) and analysed using Flowjo (Treestar)

### Cell population abundance

Mouse cDC used for MHCII immunoprecipitation were 70-85% CD11c+ pure as assessed by flow cytometry. Human monocytes used for Western blotting were 95-98% CD14+CD16- as assessed by flow cytometry.

### Gating strategy

1. SSC-A vs FSC-A to exclude cell debris
2. FSC-H vs FSC-A to include single cells
3. Viability dye (Either propidium iodide, DAPI or fixable viability dye eFluor780) vs Fsc-A to exclude dead cells
4. Further gating is described in Supplementary Figure 4

Tick this box to confirm that a figure exemplifying the gating strategy is provided in the Supplementary Information.
